# Supplementary material
Source: PubMed Central journal article supplement (PMC6290923)

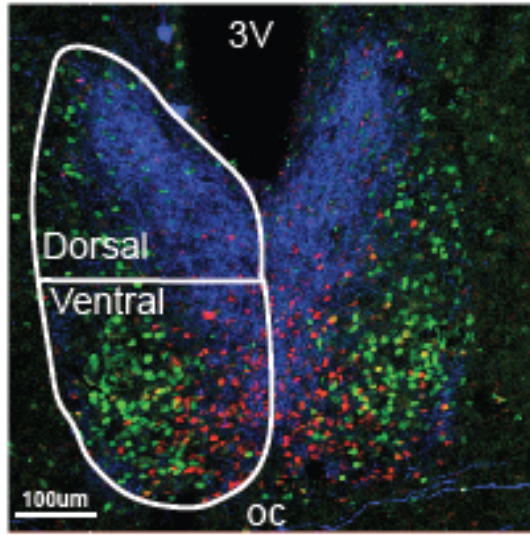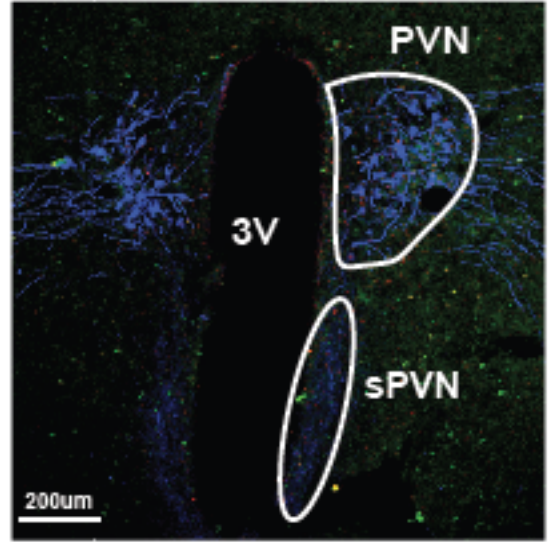

Supplement: NIHMS994166-supplement-Supp_FigS1.pdf [file NIHMS994166-supplement-Supp_FigS1.pdf]
